# Supplementary material
Source: PubMed Central journal article supplement (PMC7229262)
Supplement: bloodBLD2020004823-suppl1.pdf [file bloodBLD2020004823-suppl1.pdf]

## Supplemental Appendix

### **Ruxolitinib for the treatment of steroid-refractory acute GVHD (REACH1): a multicenter, open-label, phase 2 trial**

Madan Jagasia, Miguel-Angel Perales, Mark A. Schroeder, Haris Ali, Nirav N. Shah, Yi-Bin Chen, Salman Fazal, Fitzroy Dawkins, Michael Arbushites, Chuan Tian, Laura Connelly-Smith, Michael D. Howell, and H. Jean Khoury, on behalf of the REACH1 Study Group

#### **Contents**

|                                                                                                              |    |
|--------------------------------------------------------------------------------------------------------------|----|
| <b>List of REACH1 investigators</b> .....                                                                    | 2  |
| <b>Supplemental methods</b> .....                                                                            | 3  |
| Secondary/exploratory trial endpoints .....                                                                  | 3  |
| Description and timing of assessments .....                                                                  | 3  |
| Plasma collection for correlative biomarkers .....                                                           | 4  |
| Protein biomarker assessment .....                                                                           | 4  |
| Statistical analysis .....                                                                                   | 5  |
| <b>Supplemental results</b> .....                                                                            | 6  |
| Post hoc survival analyses .....                                                                             | 6  |
| Pharmacokinetics .....                                                                                       | 6  |
| Protein biomarker assessments .....                                                                          | 7  |
| <b>Supplemental tables</b> .....                                                                             | 9  |
| Supplemental Table 1. REACH1 inclusion and exclusion criteria.....                                           | 9  |
| Supplemental Table 2. Concomitant anti-infection therapy .....                                               | 11 |
| Supplemental Table 3. Efficacy measures (Day 28) and infections stratified by aGVHD grade at enrollment..... | 13 |
| Supplemental Table 4. ST2, REG3A, TNFR1, and trappin-2/elafin levels at baseline                             | 15 |
| Supplemental Table 5. Proteins significantly upregulated in responders (n=36) .....                          | 16 |
| Supplemental Table 6. Proteins significantly downregulated in responders (n=36)....                          | 19 |
| Supplemental Table 7. Treatment-emergent adverse events in ≥10% of patients.....                             | 20 |
| Supplemental Table 8. Summary of CMV events .....                                                            | 22 |
| <b>Supplemental figures</b> .....                                                                            | 23 |
| Supplemental Figure 1. Summary of patient disposition .....                                                  | 23 |
| Supplemental Figure 2. Mortality by response status .....                                                    | 24 |

|                                                                                                         |    |
|---------------------------------------------------------------------------------------------------------|----|
| Supplemental Figure 3. Longitudinal ST2, REG3A, TNFR1, and Trappin-2/-Elafin expression .....           | 25 |
| Supplemental Figure 4. Heatmap of significantly modulated proteins in the responder cohort (n=36) ..... | 26 |
| <b>Supplemental references</b> .....                                                                    | 28 |

## List of REACH1 investigators

| State        | Site name                                                                       | Principal investigator    |
|--------------|---------------------------------------------------------------------------------|---------------------------|
| California   | City of Hope                                                                    | Ali, Haris                |
|              | Stanford Hospital and Clinics, Stanford University School of Medicine           | Meyer, Everett            |
|              | David Geffen School of Medicine at UCLA                                         | Schiller, Gary            |
|              | UC San Diego Moores Cancer Center                                               | Tzachanis, Dimitrios      |
| Colorado     | Colorado Blood Cancer Institute                                                 | Nash, Richard             |
| Florida      | UF Health Shands Cancer Hospital                                                | Farhadfar, Nosha          |
|              | University of Miami Hospital and Clinics, Sylvester Comprehensive Cancer Center | Lekakis, Lazaros John     |
| Georgia      | Winship Cancer Institute                                                        | Langston, Amelia          |
| Illinois     | University of Chicago Medical Center                                            | Artz, Andrew              |
| Michigan     | Spectrum Health Hospitals                                                       | Abidi, Muneer             |
| Minnesota    | University of Minnesota Medical Center                                          | Rashidi, Armin            |
| Missouri     | Washington University School of Medicine                                        | Schroeder, Mark           |
| New Jersey   | Hackensack University Medical Center                                            | Rowley, Scott D.          |
| New York     | University of Rochester Medical Center                                          | Liesveld, Jane            |
|              | Memorial Sloan Kettering Cancer Center                                          | Perales, Miguel-Angel     |
| Ohio         | Oncology Hematology Care, Inc                                                   | Essell, James             |
| Pennsylvania | West Penn Hospital                                                              | Fazal, Salman             |
|              | Hospital of the University of Pennsylvania                                      | Frey, Noelle              |
|              | UPMC Hillman Cancer Center                                                      | Im, Annie                 |
|              | Thomas Jefferson University Hospital                                            | Wagner, John              |
| Tennessee    | The Sarah Cannon-Research Institute                                             | Bachier, Carlos           |
|              | Vanderbilt University Medical Center                                            | Jagasia, Madan Harikishin |
| Texas        | Methodist Healthcare System of San Antonio                                      | Freytes, Cesar            |
| Utah         | Huntsman Cancer Institute                                                       | Couriel, Daniel           |
| Washington   | Fred Hutchinson Cancer Research Center                                          | Deeg, H. Joachim          |
| Wisconsin    | Froedtert Hospital and the Medical College of Wisconsin                         | Shah, Nirav               |

## Supplemental methods

### *Secondary/exploratory trial endpoints*

Additional secondary endpoints included overall response rate (ORR) at any time, nonrelapse mortality (NRM; proportion of patients who died from causes other than malignancy relapse, with relapse as a competing risk), relapse rate (proportion of patients with relapse of underlying malignancy), overall survival (time from first ruxolitinib treatment [time 0] to death from any cause), incidence of chronic graft-versus-host disease (cGVHD), clinical safety data, and pharmacokinetics. Plasma samples for pharmacokinetics were analyzed using a validated liquid chromatographic tandem mass spectrometry assay. Exploratory endpoints included assessment of average corticosteroid dose by study visit and biomarker assessments.

### *Description and timing of assessments*

Acute graft-versus-host disease (aGVHD) grading was determined by the investigator per Mount Sinai Acute GVHD International Consortium (MAGIC) guidelines<sup>1</sup> on a weekly basis for the first 8 weeks and every 28 days thereafter, as well as at scheduled study visits on Days 100, 180, and 365 and at the end of treatment. Response was assessed according to the Center for International Blood and Marrow Transplant Research modifications to the International Bone Marrow Transplant Registry response index.<sup>2,3</sup> Patients who withdrew from treatment for reasons other than graft-versus-host disease (GVHD) progression were assessed for GVHD status every 28 days. Duration of response was assessed after all patients either completed Day 84 and Day 180 study visits or discontinued from the study. Patients were

assessed for signs and symptoms of cGVHD on Days 100, 180, and 365 and at end of treatment per National Institutes of Health consensus guidelines.<sup>4</sup> Adverse events were assessed according to National Cancer Institute Common Terminology Criteria for Adverse Events v4.03 from the time of consent through 30 days after the last ruxolitinib dose. Pharmacokinetic samples were collected on Days 1, 7, and 14 predose (trough) and 1, 2, and 4 to 8 hours postdose.

#### *Plasma collection for correlative biomarkers*

Whole blood was collected in heparinized collection tubes at designated time points. Plasma was isolated after centrifugation of whole blood at 1500 × g for 15 minutes at room temperature, frozen immediately on dry ice or between –20°C and –70°C, and then shipped to Incyte for analysis. All patients consented to the blood collection. A total of 350 plasma samples were collected from 69 patients for proteomic analysis, and 68 patients who had a defined response at Day 28 were included in the biomarker analysis.

#### *Protein biomarker assessment*

Circulating levels of regenerating islet-derived protein 3 alpha (REG3A), suppression of tumorigenicity 2 (ST2), tumor necrosis factor receptor 1 (TNFR1), and Trappin-2/Elafin were measured using SimplePlex (ProteinSimple, San Jose, CA, USA) multiplex platform based on the manufacturers' instructions.

The proximity extension assay platform by OLINK Proteomics (Watertown, MA, USA) was used to conduct high content (>1000 proteins) multiplex proteomic analysis in participant plasma samples. In this assay, a pair of oligonucleotide-labelled antibodies,

Proseek probes, is allowed to pairwise bind to the target protein present in the sample in a homogeneous assay. When the 2 Proseek probes are in close proximity, a new polymerase chain reaction (PCR) target sequence is formed by a proximity-dependent DNA polymerization event. The resulting sequence is subsequently detected and quantified using standard real-time PCR. Data are presented as normalized protein expression in log<sub>2</sub> scale.

### *Statistical analysis*

Supportive analyses of the primary endpoint included assessment of Day 28 ORR by aGVHD grade at enrollment; steroid-refractory status; average reported daily dose of ruxolitinib from Day 1 to Day 28; and baseline characteristics, including age, sex, race, and GVHD organ involvement at enrollment. Post hoc model-based analysis of Day 28 response using logistic regression assessed HLA matching, aGVHD grade at enrollment, and steroid-refractory status as covariates.

For the biomarker analyses, statistical differences in protein expression between groups were determined using unpaired *t* tests, paired *t* tests (baseline vs Day 28), and ordinary one-way analysis of variance. Significance was conferred at  $P < 0.05$  and absolute fold-change in broad protein expression was calculated as Day 28/baseline  $> 1.5$  (ie,  $> 1.5$  or  $< 0.66$ ) within each group. False discovery rate *P* values were calculated across strata.

## Supplemental results

### *Post hoc survival analyses*

In post hoc model-based analysis of NRM using the Fine and Gray model, HLA matching, aGVHD grade at enrollment, steroid-refractory status, and duration of prior corticosteroid exposure were assessed as covariates. Acute GVHD grade III/IV (hazard ratio [HR], 0.252 [95% CI, 0.11–0.58];  $P=0.0013$ ) and longer prior corticosteroid exposure (HR, 1.01 [95% CI, 1.01–1.02];  $P=0.0001$ ) were significantly associated with increased NRM. Additional NRM analyses were conducted with response status added to the model, with adjustments for HLA matching, aGVHD grade at enrollment, and corticosteroid exposure. In this model, response status was an independent predictor of NRM (HR, 0.442 [95% CI, 0.29–0.69];  $P=0.0003$ ).

### *Pharmacokinetics*

Except for use of moderate or potent cytochrome P450 3A4 inhibitors, no concomitant medications explored were identified as significant predictors of interindividual variability in pharmacokinetic parameters. Likewise, no laboratory indices of kidney and liver function (except for liver involvement on apparent oral clearance variability) were predictive of variability. When compared with data from a myelofibrosis (MF) population, absorption was slightly quicker for patients with MF than for patients with aGVHD (approximately 0.5–1 vs 1–2 hours, respectively) and for patients who did not have upper or lower gastrointestinal (GI) involvement (grade 0 or 1).

### *Protein biomarker assessments*

Supplemental Table 4 illustrates the average individual concentrations of ST2, REG3A, TNFR1, and Trappin-2/Elafin for each patient within each cohort between responders (complete response, very good partial response, partial response) and nonresponders (mixed response, progressive disease/death). Significantly elevated levels of ST2 ( $P=0.0001$ ) and TNFR1 ( $P=0.012$ ) were observed in nonresponders versus responders at baseline. No significant differences were observed in the baseline levels of REG3A or Trappin-2/Elafin between nonresponders and responders.

Longitudinally, levels of ST2 decreased over time with treatment (Supplemental Figure 3A). Although baseline levels of ST2 were significantly different between responders and nonresponders, there were no apparent differences in the degree of reduction in ST2 levels between the cohorts. Analysis of REG3A levels in responders and nonresponders over the various visits demonstrated a rapid decrease by Day 14, with minimal differences observed between the groups in response to treatment (Supplemental Figure 3B). A similar decrease in Trappin-2/Elafin levels in responders and nonresponders over the various visits was observed in both groups in response to treatment (Supplemental Figure 3C). TNFR1 protein expression did not significantly change over time in response to treatment (Supplemental Figure 3D).

Broad proteomic analysis was conducted on 36 responders and 6 nonresponders. Among responders, 60 proteins were upregulated, and 19 were downregulated (Supplemental Tables 5 and 6). Proteins significantly modulated in responders are illustrated in a heatmap (Supplemental Figure 4) using R v3.5.0 “heatmaply” package.<sup>5</sup> Proteins that were significantly modulated in the responder

population were analyzed further using ingenuity pathway analysis (Qiagen, Inc., Germantown, MD, USA). Analysis determined an association between the expression pattern in the patients who received ruxolitinib and the hematopoiesis and interleukin-17-mediated inflammation pathways.



## Supplemental tables

### Supplemental Table 1. REACH1 inclusion and exclusion criteria

| Inclusion criteria                                                                                                                                                                                                                                                                                                                                                                                                                                                                                                                                                                                                                                                                                                                                                                                                                                                                                                                                                                                                                                                                                                                                                                                                                                                                                                                                                                                                                                                                                                                                                                                                                                                                                                                                                                                                                                                                                                                                                                                                                                                                                                                                                                                                                                                                                                                                                                                                                                                                                                                                                                                                                                                                                                                                                                                                                                     |
|--------------------------------------------------------------------------------------------------------------------------------------------------------------------------------------------------------------------------------------------------------------------------------------------------------------------------------------------------------------------------------------------------------------------------------------------------------------------------------------------------------------------------------------------------------------------------------------------------------------------------------------------------------------------------------------------------------------------------------------------------------------------------------------------------------------------------------------------------------------------------------------------------------------------------------------------------------------------------------------------------------------------------------------------------------------------------------------------------------------------------------------------------------------------------------------------------------------------------------------------------------------------------------------------------------------------------------------------------------------------------------------------------------------------------------------------------------------------------------------------------------------------------------------------------------------------------------------------------------------------------------------------------------------------------------------------------------------------------------------------------------------------------------------------------------------------------------------------------------------------------------------------------------------------------------------------------------------------------------------------------------------------------------------------------------------------------------------------------------------------------------------------------------------------------------------------------------------------------------------------------------------------------------------------------------------------------------------------------------------------------------------------------------------------------------------------------------------------------------------------------------------------------------------------------------------------------------------------------------------------------------------------------------------------------------------------------------------------------------------------------------------------------------------------------------------------------------------------------------|
| <ul style="list-style-type: none"><li>• Male or female, aged <math>\geq 12</math> y</li><li>• Has undergone first allo-HSCT from any donor source (matched unrelated donor, sibling, haploidentical) using bone marrow, peripheral blood stem cells, or cord blood for hematologic malignancies; recipients of nonmyeloablative and myeloablative transplants are eligible</li><li>• Clinically suspected grades II–IV aGVHD per MAGIC guidelines, occurring after allo-HSCT with any conditioning regimen and any anti-GVHD prophylactic program. Biopsies should be obtained to pathologically confirm acute GVHD; in cases where a biopsy is negative, is unable to be obtained, or is clinically contraindicated, clinical suspicion of aGVHD by the treating physician is sufficient</li><li>• Patients with steroid-refractory aGVHD, defined as any of the following:<ul style="list-style-type: none"><li>○ Patients with progressive GVHD (ie, increase in stage in any organ system or any new organ involvement) after 3 d of primary treatment with methylprednisolone <math>\geq 2</math> mg/kg/d (or equivalent)</li><li>○ Patients with GVHD that has not improved (ie, decrease in stage in at least 1 involved organ system) after 7 d of primary treatment with methylprednisolone <math>\geq 2</math> mg/kg/d (or equivalent)</li><li>○ Patients who previously began corticosteroid therapy at a lower dose (<math>\geq 1</math> mg/kg/d methylprednisolone) for treatment of skin GVHD or skin GVHD accompanied by upper GI GVHD but develop new GVHD in another organ system</li><li>○ Patients who cannot tolerate a corticosteroid taper, that is, begin corticosteroids at 2.0 mg/kg/d, demonstrate response, but progress before a 50% decrease from the initial starting dose of corticosteroids is achieved</li></ul></li><li>• Evidence of myeloid engraftment (eg, absolute neutrophil count <math>\geq 0.5 \times 10^9/L</math> for 3 consecutive days if ablative therapy was previously used)</li><li>• Willingness to avoid pregnancy or fathering children based on 1 of the following criteria:<ul style="list-style-type: none"><li>○ Women of nonchildbearing potential (ie, surgically sterile with a hysterectomy and/or bilateral oophorectomy or <math>\geq 12</math> mo of amenorrhea)</li><li>○ Women of childbearing potential who have a negative serum pregnancy test at screening and who agree to take appropriate precautions to avoid pregnancy from screening through safety follow-up</li><li>○ Men who agree to take appropriate precautions to avoid fathering children from screening through safety follow-up</li></ul></li><li>• Written informed consent and/or assent from the patient, parent, or guardian</li><li>• Willingness to comply with all study visits and procedures</li></ul> |
| Exclusion criteria                                                                                                                                                                                                                                                                                                                                                                                                                                                                                                                                                                                                                                                                                                                                                                                                                                                                                                                                                                                                                                                                                                                                                                                                                                                                                                                                                                                                                                                                                                                                                                                                                                                                                                                                                                                                                                                                                                                                                                                                                                                                                                                                                                                                                                                                                                                                                                                                                                                                                                                                                                                                                                                                                                                                                                                                                                     |
| <ul style="list-style-type: none"><li>• Has received more than 1 allo-HSCT</li><li>• Has received more than 1 systemic treatment in addition to corticosteroids for acute GVHD</li></ul>                                                                                                                                                                                                                                                                                                                                                                                                                                                                                                                                                                                                                                                                                                                                                                                                                                                                                                                                                                                                                                                                                                                                                                                                                                                                                                                                                                                                                                                                                                                                                                                                                                                                                                                                                                                                                                                                                                                                                                                                                                                                                                                                                                                                                                                                                                                                                                                                                                                                                                                                                                                                                                                               |

- 
- Presence of GVHD overlap syndrome per NIH guidelines
  - Has had a splenectomy
  - Presence of an active uncontrolled infection defined as hemodynamic instability attributable to sepsis or new symptoms, worsening physical signs, or radiographic findings attributable to infection
  - Known HIV infection
  - Active HBV or HCV infection that requires treatment or at risk for HBV reactivation (defined as hepatitis B surface antigen positive or anti-hepatitis B core antibody positive)
  - Serum creatinine  $\geq 2.0$  mg/dL or creatinine clearance  $< 40$  mL/min as measured or calculated by Cockcroft-Gault equation
  - Patients with evidence of primary relapsed disease or patients who have been treated for relapse after the allo-HSCT was performed
  - Unresolved toxicity or complications (other than aGVHD) due to previous allo-HSCT
  - Any corticosteroid therapy for indications other than GVHD at doses of methylprednisolone or equivalent  $\geq 1$  mg/kg/d within 7 d of enrollment
  - Severe organ dysfunction unrelated to underlying GVHD, including
    - Cholestatic disorders or unresolved veno-occlusive disease of the liver (defined as persistent bilirubin abnormalities not attributable to GVHD and ongoing organ dysfunction)
    - Clinically significant or uncontrolled cardiac disease, including unstable angina, acute myocardial infarction within 6 mo from Day 1 of study drug administration, New York Heart Association class III or IV congestive heart failure, circulatory collapse requiring vasopressor or inotropic support, or arrhythmia that requires therapy
    - Clinically significant respiratory disease that requires mechanical ventilation support or 50% oxygen
  - Currently breastfeeding
  - Received JAK inhibitor therapy after allo-HSCT for any indication; treatment with a JAK inhibitor before allo-HSCT is permitted
  - Treatment with any other investigational agent, device, or procedure, within 21 d (or 5 half-lives, whichever is greater) of enrollment
  - Any condition that would, in the investigator's judgment, interfere with full participation in the study
  - Known allergies, hypersensitivity, or intolerance to any of the study medications, excipients, or similar compounds

---

allo-HSCT, allogeneic hematopoietic stem cell transplantation; HBV, hepatitis B virus; HCV, hepatitis C virus; JAK, Janus kinase; NIH, National Institutes of Health.

**Supplemental Table 2. Concomitant anti-infection therapy**

| <b>Medication</b>                                                     | <b>Ruxolitinib (N=71)</b> |
|-----------------------------------------------------------------------|---------------------------|
| Any concomitant anti-infection therapy                                | 71 (100.0)                |
| Antibiotics                                                           | 27 (38.0)                 |
| Nystatin                                                              | 13 (18.3)                 |
| Amphotericin b, liposome                                              | 6 (8.5)                   |
| Erythromycin                                                          | 5 (7.0)                   |
| Amphotericin b                                                        | 1 (1.4)                   |
| Azithromycin                                                          | 1 (1.4)                   |
| Bacitracin                                                            | 1 (1.4)                   |
| Nystadermal                                                           | 1 (1.4)                   |
| Polymyxin b with trimethoprim                                         | 1 (1.4)                   |
| Polysporin sterile ophthalmic                                         | 1 (1.4)                   |
| Rifaximin                                                             | 1 (1.4)                   |
| Tobramycin                                                            | 1 (1.4)                   |
| Vancomycin                                                            | 1 (1.4)                   |
| Combinations of penicillins, including beta-lactamase inhibitors      | 16 (22.5)                 |
| Pip/tazo                                                              | 13 (18.3)                 |
| Duocid                                                                | 3 (4.2)                   |
| Augmentin                                                             | 2 (2.8)                   |
| Amoxicillin with clavulanate potassium                                | 1 (1.4)                   |
| Unacid                                                                | 1 (1.4)                   |
| Combinations of sulphonamides and trimethoprim, including derivatives | 25 (35.2)                 |
| Bactrim                                                               | 25 (35.2)                 |
| First-generation cephalosporins                                       | 5 (7.0)                   |
| Cefazolin                                                             | 4 (5.6)                   |
| Cefalexin                                                             | 1 (1.4)                   |
| Fluoroquinolones                                                      | 31 (43.7)                 |
| Levofloxacin                                                          | 19 (26.8)                 |
| Ciprofloxacin                                                         | 15 (21.1)                 |
| Moxifloxacin                                                          | 2 (2.8)                   |
| Fourth-generation cephalosporins                                      | 29 (40.8)                 |
| Cefepime                                                              | 29 (40.8)                 |
| Cefepime hydrochloride                                                | 1 (1.4)                   |
| Glycopeptide antibacterials                                           | 30 (42.3)                 |
| Vancomycin                                                            | 30 (42.3)                 |
| Imidazole derivatives                                                 | 18 (25.4)                 |
| Metronidazole                                                         | 18 (25.4)                 |
| Macrolides                                                            | 13 (18.3)                 |
| Azithromycin                                                          | 12 (16.9)                 |
| Erythromycin lactobionate                                             | 1 (1.4)                   |

---

|                                                                          |           |
|--------------------------------------------------------------------------|-----------|
| Nucleosides and nucleotides (excluding reverse transcriptase inhibitors) | 69 (97.2) |
| Aciclovir                                                                | 55 (77.5) |
| Ganciclovir                                                              | 21 (29.6) |
| Valganciclovir                                                           | 12 (16.9) |
| Valaciclovir hydrochloride                                               | 7 (9.9)   |
| Valganciclovir hydrochloride                                             | 6 (8.5)   |
| Cidofovir                                                                | 3 (4.2)   |
| Ribavirin                                                                | 2 (2.8)   |
| Famciclovir                                                              | 1 (1.4)   |
| Valaciclovir                                                             | 1 (1.4)   |
| Other antivirals                                                         |           |
| Letermovir                                                               | 1 (1.4)   |
| Other antibacterials                                                     | 11 (15.5) |
| Daptomycin                                                               | 8 (11.3)  |
| Linezolid                                                                | 6 (8.5)   |
| Methenamine                                                              | 1 (1.4)   |
| Other antimycotics for systemic use                                      | 42 (59.2) |
| Micafungin                                                               | 31 (43.7) |
| Caspofungin                                                              | 9 (12.7)  |
| Micafungin sodium                                                        | 5 (7.0)   |
| Caspofungin acetate                                                      | 1 (1.4)   |
| Triazole derivatives                                                     | 59 (83.1) |
| Posaconazole                                                             | 28 (39.4) |
| Voriconazole                                                             | 22 (31.0) |
| Fluconazole                                                              | 16 (22.5) |
| Isavuconazonium                                                          | 11 (15.5) |
| Isavuconazonium sulfate                                                  | 6 (8.5)   |

---

Data are provided as n (%).

**Supplemental Table 3. Efficacy measures (Day 28) and infections stratified by aGVHD grade at enrollment**

|                                              | Grade II (n=23)            | Grade III/IV (n=48)      |
|----------------------------------------------|----------------------------|--------------------------|
| ORR, n (%)                                   | 19 (82.6)                  | 20 (41.7)                |
| CR                                           | 11 (47.8)                  | 8 (16.7)                 |
| VGPR                                         | 4 (17.4)                   | 3 (6.3)                  |
| PR                                           | 4 (17.4)                   | 9 (18.8)                 |
| DOR, median (95% CI), mo                     |                            |                          |
| CR/VGPR                                      | n=15<br>NE (29.0–NE)       | n=11<br>345.0 (106.0–NE) |
| PR                                           | n=4<br>NE (NE–NE)          | n=9<br>159.0 (29.0–NE)   |
| OS, median (95% CI), mo                      |                            |                          |
| CR/VGPR                                      | n=15<br>NE (4.1–NE)        | n=11<br>NE (5.3–NE)      |
| PR                                           | n=4<br>NE (NE–NE)          | n=9<br>5.4 (1.4–NE)      |
| OS, 6-mo probability (95%CI)                 |                            |                          |
| CR/VGPR                                      | n=15<br>73.3 (43.6–89.1)   | n=11<br>81.8 (44.7–95.1) |
| PR                                           | n=4<br>100.0 (100.0–100.0) | n=9<br>45.7 (11.0–75.7)  |
| OS, 12-mo probability (95% CI)               |                            |                          |
| CR/VGPR                                      | n=15<br>65.2 (35.1–83.9)   | n=11<br>81.8 (44.7–95.1) |
| PR                                           | n=4<br>100.0 (100.0–100.0) | n=9<br>30.5 (4.5–63.4)   |
| NRM, n (%)                                   |                            |                          |
| CR/VGPR                                      | 4 (26.7)                   | 1 (9.1)                  |
| PR                                           | —                          | 5 (55.6)                 |
| NRM, 6-mo cumulative incidence rate (95% CI) |                            |                          |

|                                                             |                 |                  |
|-------------------------------------------------------------|-----------------|------------------|
| CR/VGPR                                                     | 20.0 (4.9–42.4) | 9.1 (0.5–33.3)   |
| PR                                                          | -               | 54.3 (15.5–81.9) |
| NRM, 12-mo cumulative incidence rate (95% CI)               |                 |                  |
| CR/VGPR                                                     | 28.1 (8.5–52.0) | 9.1 (0.5–33.3)   |
| PR                                                          | —               | 69.5 (23.8–91.2) |
| Prior corticosteroid use, median (range), d                 | 17.0 (6–285)    | 12.0 (3–224)     |
| ORR in patients with skin involvement at baseline, n (%)    | n=17            | n=19             |
|                                                             | 15 (88.2)       | 7 (36.8)         |
| CR                                                          | 7 (41.2)        | 2 (10.5)         |
| VGPR                                                        | 4 (23.5)        | 2 (10.5)         |
| PR                                                          | 4 (23.5)        | 3 (15.8)         |
| ORR in patients with no skin involvement at baseline, n (%) | n=6             | n=29             |
|                                                             | 4 (66.7)        | 13 (44.8)        |
| CR                                                          | 4 (66.7)        | 6 (20.7)         |
| VGPR                                                        | 0               | 1 (3.4)          |
| PR                                                          | 0               | 6 (20.7)         |
| Patients with grade 4 infections                            | n=3             | n=16             |
| Response status, n (%)                                      |                 |                  |
| CR                                                          | 2 (66.7)        | 1 (6.3)          |
| VGPR                                                        | 1 (33.3)        | 1 (6.3)          |
| PR                                                          | 0               | 2 (12.5)         |
| Other response (including no response)                      | 0               | 12 (75.0)        |
| Organ involvement at baseline, n (%)                        |                 |                  |
| Skin                                                        | 3 (100.0)       | 6 (37.5)         |
| Non-skin                                                    | 0               | 10 (62.5)        |

CR indicates complete response; DOR, duration of response; NE, not evaluable; OS, overall survival; PR, partial response; VGPR, very good partial response.

**Supplemental Table 4. ST2, REG3A, TNFR1, and trappin-2/elafin levels at baseline**

| <b>Protein</b>  | <b>Mean ± SEM<br/>(range), ng/mL</b> | <b>Responders<br/>mean ± SEM, ng/mL</b> | <b>Nonresponders<br/>mean ± SEM, ng/mL</b> | <b><i>P</i></b> |
|-----------------|--------------------------------------|-----------------------------------------|--------------------------------------------|-----------------|
| ST2             | 413.8±41.5<br>(55.0–2151.5)          | 282.8±23.9                              | 590.0±81.8                                 | 0.0001          |
| REG3A           | 25.1±4.3<br>(0.9–235.5)              | 23.3±4.8                                | 27.6±7.9                                   | 0.62            |
| TNFR1           | 3.6±0.3<br>(1.0–18.4)                | 2.9±0.2                                 | 4.4±0.6                                    | 0.012           |
| Trappin2/elafin | 55.2±17.5<br>(2.4–1037.7)            | 55.6±26.5                               | 54.8±20.7                                  | 0.98            |

SEM, standard error of the mean.

**Supplemental Table 5. Proteins significantly upregulated in responders (n=36)**

| <b>Assay</b>   | <b>Protein</b>                               | <b>Uniprot ID</b> | <b>Raw <i>P</i> value</b> | <b>FDR <i>P</i> value</b> | <b>Fold-change*</b> |
|----------------|----------------------------------------------|-------------------|---------------------------|---------------------------|---------------------|
| <b>EPO</b>     | Erythropoietin                               | P01588            | <0.001                    | <0.001                    | 4.26                |
| <b>THPO</b>    | Thrombopoietin                               | P40225            | <0.001                    | <0.001                    | 2.78                |
| <b>GCG</b>     | Glucagon                                     | P01275            | <0.001                    | 0.001                     | 2.75                |
| <b>FGF-21</b>  | Fibroblast growth factor 21                  | Q9NSA1            | <0.001                    | 0.004                     | 2.73                |
| <b>Flt3L</b>   | Fms-related tyrosine kinase 3 ligand         | P49771            | <0.001                    | <0.001                    | 2.52                |
| <b>FGF-21</b>  | Fibroblast growth factor 21                  | Q9NSA1            | 0.001                     | 0.005                     | 2.51                |
| <b>FGF-21</b>  | Fibroblast growth factor 21                  | Q9NSA1            | <0.001                    | 0.003                     | 2.37                |
| <b>CCL28</b>   | C-C motif chemokine ligand 28                | Q9NRJ3            | 0.002                     | 0.016                     | 2.20                |
| <b>FABP4</b>   | Fatty acid binding protein 4                 | P15090            | <0.001                    | <0.001                    | 2.15                |
| <b>FAM3B</b>   | Family with sequence similarity 3 member B   | P58499            | <0.001                    | <0.001                    | 2.12                |
| <b>IL6</b>     | Interleukin 6                                | P05231            | 0.001                     | 0.010                     | 2.12                |
| <b>FABP2</b>   | Fatty acid binding protein 2                 | P12104            | 0.004                     | 0.026                     | 2.08                |
| <b>IL6</b>     | Interleukin 6                                | P05231            | 0.001                     | 0.009                     | 2.08                |
| <b>IL6</b>     | Interleukin 6                                | P05231            | 0.001                     | 0.011                     | 2.06                |
| <b>IL6</b>     | Interleukin 6                                | P05231            | 0.003                     | 0.018                     | 2.00                |
| <b>CCL25</b>   | C-C motif chemokine ligand 25                | O15444            | <0.001                    | <0.001                    | 1.99                |
| <b>VWC2</b>    | Von Willebrand factor C domain containing 2  | Q2TAL6            | <0.001                    | <0.001                    | 1.98                |
| <b>FAM19A5</b> | Family with sequence similarity 19 member A5 | Q7Z5A7            | <0.001                    | <0.001                    | 1.90                |
| <b>PLIN1</b>   | Perilipin 1                                  | O60240            | <0.001                    | 0.001                     | 1.88                |
| <b>MCP-1</b>   | C-C motif chemokine ligand 2                 | P13500            | <0.001                    | <0.001                    | 1.85                |
| <b>NPPC</b>    | Natriuretic peptide C                        | P23582            | <0.001                    | <0.001                    | 1.84                |
| <b>SCF</b>     | Kit ligand                                   | P21583            | <0.001                    | <0.001                    | 1.84                |
| <b>SCF</b>     | Kit ligand                                   | P21583            | <0.001                    | <0.001                    | 1.83                |
| <b>FBP1</b>    | Fructose-biphosphatase 1                     | P09467            | 0.006                     | 0.037                     | 1.83                |
| <b>SCF</b>     | Kit ligand                                   | P21583            | <0.001                    | <0.001                    | 1.79                |



|                          |                                                           |        |        |        |      |
|--------------------------|-----------------------------------------------------------|--------|--------|--------|------|
| <b>SMOC2</b>             | SPARC related modular calcium-binding protein 2           | Q9H3U7 | <0.001 | <0.001 | 1.79 |
| <b>TSHB</b>              | Thyroid stimulating hormone beta                          | P01222 | 0.001  | 0.011  | 1.75 |
| <b>MCP-1</b>             | C-C motif chemokine ligand 2                              | P13500 | <0.001 | <0.001 | 1.73 |
| <b>hK14</b>              | Kallikrein 14                                             | Q9P0G3 | <0.001 | <0.001 | 1.72 |
| <b>IL8</b>               | Interleukin 8                                             | P10145 | 0.001  | 0.009  | 1.72 |
| <b>CD8A</b>              | CD8a molecule                                             | P01732 | 0.005  | 0.030  | 1.68 |
| <b>PPY</b>               | Pancreatic prohormone                                     | P01298 | <0.001 | 0.001  | 1.67 |
| <b>CPA2</b>              | Carboxypeptidase A2                                       | P48052 | 0.017  | 0.077  | 1.66 |
| <b>CHRDL2</b>            | Chordin-like protein 2                                    | Q6WN34 | <0.001 | <0.001 | 1.65 |
| <b>BMP-6</b>             | Bone morphogenetic protein 6                              | P22004 | <0.001 | <0.001 | 1.65 |
| <b>FAM3C</b>             | Family with sequence similarity 3 member C                | Q92520 | <0.001 | <0.001 | 1.64 |
| <b>TNNI3<sup>†</sup></b> | Troponin I3, cardiac type                                 | P19429 | 0.031  | 0.12   | 1.62 |
| <b>MK</b>                | Midkine (neurite growth-promoting factor 2)               | P21741 | 0.012  | 0.059  | 1.62 |
| <b>ADAM-TS15</b>         | ADAM metallopeptidase with thrombospondin type 1 motif 15 | Q8TE58 | <0.001 | <0.001 | 1.61 |
| <b>MMP12</b>             | Matrix metallopeptidase 12                                | P39900 | <0.001 | 0.002  | 1.60 |
| <b>CEACAM5</b>           | Carcinoembryonic antigen related cell adhesion molecule 5 | P06731 | <0.001 | <0.001 | 1.60 |
| <b>CXCL16</b>            | C-X-C motif chemokine ligand 16                           | Q9H2A7 | <0.001 | <0.001 | 1.59 |
| <b>hK11</b>              | Kallikrein 11                                             | Q9UBX7 | <0.001 | <0.001 | 1.58 |
| <b>SLITRK2</b>           | SLIT and NTRK-like family member 2                        | Q9H156 | <0.001 | <0.001 | 1.57 |
| <b>GHRL<sup>†</sup></b>  | Ghrelin and obestatin prepropeptide                       | Q9UBU3 | <0.001 | 0.004  | 1.56 |
| <b>KAZALD1</b>           | Kazal-type serine peptidase inhibitor domain 1            | Q96I82 | <0.001 | <0.001 | 1.56 |
| <b>Notch 3</b>           | Neurogenic locus notch homolog protein 3                  | Q9UM47 | <0.001 | <0.001 | 1.54 |
| <b>CLMP</b>              | CXADR-like membrane protein                               | Q9H6B4 | <0.001 | <0.001 | 1.54 |
| <b>TFPI-2</b>            | Tissue factor pathway inhibitor 2                         | P48307 | 0.004  | 0.025  | 1.54 |
| <b>GDF-2</b>             | Growth differentiation factor 2                           | Q9UK05 | <0.001 | <0.001 | 1.53 |
| <b>GAL</b>               | Galanin propeptides                                       | P22466 | 0.002  | 0.012  | 1.53 |
| <b>Ep-CAM</b>            | Epithelial cell adhesion molecule                         | P16422 | <0.001 | 0.002  | 1.53 |
| <b>IGFBP-1</b>           | Insulin-like growth factor binding protein 1              | P08833 | 0.034  | 0.13   | 1.53 |
| <b>GDF-8</b>             | Growth differentiation factor 8                           | O14793 | <0.001 | 0.002  | 1.53 |

|                 |                                       |        |        |        |      |
|-----------------|---------------------------------------|--------|--------|--------|------|
| <b>CTRC</b>     | Chymotrypsin C                        | Q99895 | 0.009  | 0.046  | 1.52 |
| <b>LEP</b>      | Leptin                                | P41159 | 0.004  | 0.023  | 1.52 |
| <b>GDF-15</b>   | Growth differentiation factor 15      | Q99988 | <0.001 | 0.001  | 1.52 |
| <b>ROBO2</b>    | Roundabout homolog 2                  | Q9HCK4 | <0.001 | <0.001 | 1.51 |
| <b>FR-alpha</b> | Folate receptor alpha                 | P15328 | <0.001 | <0.001 | 1.51 |
| <b>KIM1</b>     | Hepatitis A virus cellular receptor 1 | Q96D42 | <0.001 | 0.001  | 1.50 |

Broad proteomic analysis used 12 panels containing approximately 90 proteins on each panel. Select protein assays may appear on more than 1 panel for analysis; therefore, the protein assay may have more than 1 measurement.

FDR, false discovery rate; LOD, limit of detection.

\* Fold-change denotes change from baseline (Day 28/baseline). Values above 1 indicate upregulation.

† Indicates that >20% of values were below LOD and replaced with 0.5 × LOD in the analysis.

**Supplemental Table 6. Proteins significantly downregulated in responders (n=36)**

| Assay             | Protein                                                 | Uniprot ID | Raw <i>P</i> value | FDR <i>P</i> value | Fold-change* |
|-------------------|---------------------------------------------------------|------------|--------------------|--------------------|--------------|
| TNC               | Tenascin C                                              | P24821     | 0.001              | 0.009              | 0.66         |
| CD69              | CD69 molecule                                           | Q07108     | 0.005              | 0.032              | 0.66         |
| ZBTB16            | Zinc finger and BTB domain-containing protein 16        | Q05516     | 0.001              | 0.005              | 0.66         |
| CXCL11            | C-X-C motif chemokine ligand 11                         | O14625     | 0.013              | 0.064              | 0.66         |
| TANK <sup>†</sup> | TRAF family member-associated NFκB activator            | Q92844     | 0.002              | 0.014              | 0.66         |
| CD2AP             | CD2-associated protein                                  | Q9Y5K6     | 0.005              | 0.032              | 0.66         |
| LAIR-2            | Leukocyte-associated immunoglobulin-like receptor 2     | Q6ISS4     | <0.001             | 0.001              | 0.65         |
| ST1A1             | Sulfotransferase family 1A member 1                     | P50225     | 0.006              | 0.036              | 0.65         |
| STK4              | Serine/threonine kinase 4                               | Q13043     | 0.007              | 0.040              | 0.65         |
| CXCL9             | C-X-C motif chemokine ligand 9                          | Q07325     | 0.034              | 0.13               | 0.65         |
| GZMB              | Granzyme B                                              | P10144     | 0.027              | 0.11               | 0.65         |
| GZMH              | Granzyme H                                              | P20718     | 0.001              | 0.008              | 0.64         |
| SIT1              | Signalling threshold regulating transmembrane adaptor 1 | Q9Y3P8     | <0.001             | <0.001             | 0.62         |
| BANK1             | B-cell scaffold protein with ankyrin repeats 1          | Q8NDB2     | 0.004              | 0.026              | 0.62         |
| CXCL10            | C-X-C motif chemokine ligand 10                         | P02778     | 0.036              | 0.13               | 0.62         |
| RNASE3            | Ribonuclease A family member 3                          | P12724     | <0.001             | 0.002              | 0.61         |
| ZBTB16            | Zinc finger and BTB domain-containing protein 16        | Q05516     | <0.001             | 0.002              | 0.61         |
| PDGF subunit B    | Platelet derived growth factor subunit B                | P01127     | 0.036              | 0.13               | 0.61         |
| IL2-RA            | Interleukin 2 receptor subunit alpha                    | P01589     | 0.004              | 0.026              | 0.57         |

Broad proteomic analysis utilized 12 panels that contained approximately 90 proteins on each panel. Select protein assays may appear on more than 1 panel for analysis; therefore, the protein assay may have more than 1 measurement.

\* Fold-change denotes change from baseline (Day 28/baseline). Values below 1 indicate downregulation.

† Indicates that >20% of values were below LOD and replaced with 0.5 × LOD in the analysis.

**Supplemental Table 7. Treatment-emergent adverse events in ≥10% of patients**

| Event                                | Ruxolitinib (N=71) |           |
|--------------------------------------|--------------------|-----------|
|                                      | Any grade          | Grade 3/4 |
| Anemia                               | 46 (64.8)          | 36 (50.7) |
| Hypokalemia                          | 35 (49.3)          | 13 (18.3) |
| Peripheral edema                     | 32 (45.1)          | 8 (11.3)  |
| Platelet count decreased*            | 32 (45.1)          | 28 (39.4) |
| Neutrophil count decreased           | 28 (39.4)          | 23 (32.4) |
| Muscular weakness                    | 24 (33.8)          | 8 (11.3)  |
| Dyspnea                              | 23 (32.4)          | 5 (7.0)   |
| Hypomagnesemia                       | 23 (32.4)          | 2 (2.8)   |
| Hypocalcemia                         | 22 (31.0)          | 8 (11.3)  |
| Nausea                               | 22 (31.0)          | 4 (5.6)   |
| Fatigue                              | 21 (29.6)          | 10 (14.1) |
| White blood cell count decreased     | 21 (29.6)          | 12 (16.9) |
| Diarrhea                             | 20 (28.2)          | 5 (7.0)   |
| Alanine aminotransferase increased   | 18 (25.4)          | 4 (5.6)   |
| Hyperglycemia                        | 18 (25.4)          | 14 (19.7) |
| Hypophosphatemia                     | 18 (25.4)          | 11 (15.5) |
| Vomiting                             | 18 (25.4)          | 2 (2.8)   |
| Aspartate aminotransferase increased | 17 (23.9)          | 1 (1.4)   |
| Back pain                            | 17 (23.9)          | 3 (4.2)   |
| Acute kidney injury                  | 16 (22.5)          | 5 (7.0)   |
| Hypertension                         | 16 (22.5)          | 9 (12.7)  |
| Abdominal pain                       | 15 (21.1)          | 5 (7.0)   |
| Headache                             | 15 (21.1)          | 3 (4.2)   |
| Hypotension                          | 15 (21.1)          | 10 (14.1) |
| Pyrexia                              | 15 (21.1)          | 2 (2.8)   |
| Decreased appetite                   | 14 (19.7)          | 6 (8.5)   |
| Fall                                 | 14 (19.7)          | 2 (2.8)   |
| Hyponatremia                         | 14 (19.7)          | 10 (14.1) |
| Sinus tachycardia                    | 14 (19.7)          | 0         |
| Thrombocytopenia*                    | 14 (19.7)          | 10 (14.1) |
| Cough                                | 13 (18.3)          | 0         |
| Hypoalbuminemia                      | 13 (18.3)          | 10 (14.1) |
| Arthralgia                           | 12 (16.9)          | 1 (1.4)   |
| Blood creatinine increased           | 12 (16.9)          | 0         |
| Hematuria                            | 12 (16.9)          | 0         |
| Abdominal distension                 | 11 (15.5)          | 2 (2.8)   |
| Blood bilirubin increased            | 11 (15.5)          | 7 (9.9)   |
| Constipation                         | 11 (15.5)          | 0         |

|                            |           |           |
|----------------------------|-----------|-----------|
| Depression                 | 11 (15.5) | 0         |
| Dry mouth                  | 11 (15.5) | 0         |
| Flatulence                 | 11 (15.5) | 0         |
| Lower GI hemorrhage        | 11 (15.5) | 6 (8.5)   |
| Pain in extremity          | 11 (15.5) | 1 (1.4)   |
| Anxiety                    | 10 (14.1) | 1 (1.4)   |
| Confusional state          | 10 (14.1) | 3 (4.2)   |
| Dizziness                  | 10 (14.1) | 0         |
| Hypoglycemia               | 10 (14.1) | 1 (1.4)   |
| Insomnia                   | 10 (14.1) | 0         |
| Respiratory failure        | 10 (14.1) | 10 (14.1) |
| Cytomegalovirus infection  | 9 (12.7)  | 4 (5.6)   |
| Dry eye                    | 9 (12.7)  | 0         |
| Hypertriglyceridemia       | 9 (12.7)  | 2 (2.8)   |
| Pollakiuria                | 9 (12.7)  | 0         |
| Rash maculopapular         | 9 (12.7)  | 2 (2.8)   |
| Sepsis                     | 9 (12.7)  | 8 (11.3)  |
| Epistaxis                  | 8 (11.3)  | 1 (1.4)   |
| Lymphocyte count decreased | 8 (11.3)  | 8 (11.3)  |
| Pleural effusion           | 8 (11.3)  | 1 (1.4)   |

Data are presented as n (%). The data cutoff was July 2, 2018. Multiple occurrences of the same adverse event in 1 patient were counted only once per preferred term at the highest grade.

\* The terms *platelet count decreased* and *thrombocytopenia* were used by investigators when reporting adverse events and therefore were recorded as separate terms in the safety database.

**Supplemental Table 8. Summary of CMV events**

| CMV status        | Before enrollment |               |                             | Treatment-emergent |               |                             |
|-------------------|-------------------|---------------|-----------------------------|--------------------|---------------|-----------------------------|
|                   | CMV viremia       | CMV infection | No CMV viremia or infection | CMV viremia        | CMV infection | No CMV viremia or infection |
| D-/R- (n=23)      | 0                 | 0             | 23 (100.0)                  | 0                  | 0             | 23 (100.0)                  |
| D-/R+ (n=16)      | 2 (12.5)          | 2 (12.5)      | 12 (75.0)                   | 1 (6.3)            | 0             | 15 (93.8)                   |
| D+/R+ (n=24)      | 5 (20.8)          | 5 (20.8)      | 14 (58.3)                   | 3 (12.5)           | 8 (33.3)      | 13 (54.2)                   |
| D+/R- (n=7)       | 0                 | 0             | 7 (100.0)                   | 0                  | 2 (28.6)      | 5 (71.4)                    |
| Any/unknown (n=1) | 1 (100.0)         | 0             | 0                           | 0                  | 0             | 1 (100.0)                   |

Data are presented as n (%).

CMV, cytomegalovirus; D, donor; R, recipient.

## Supplemental figures

### Supplemental Figure 1. Summary of patient disposition

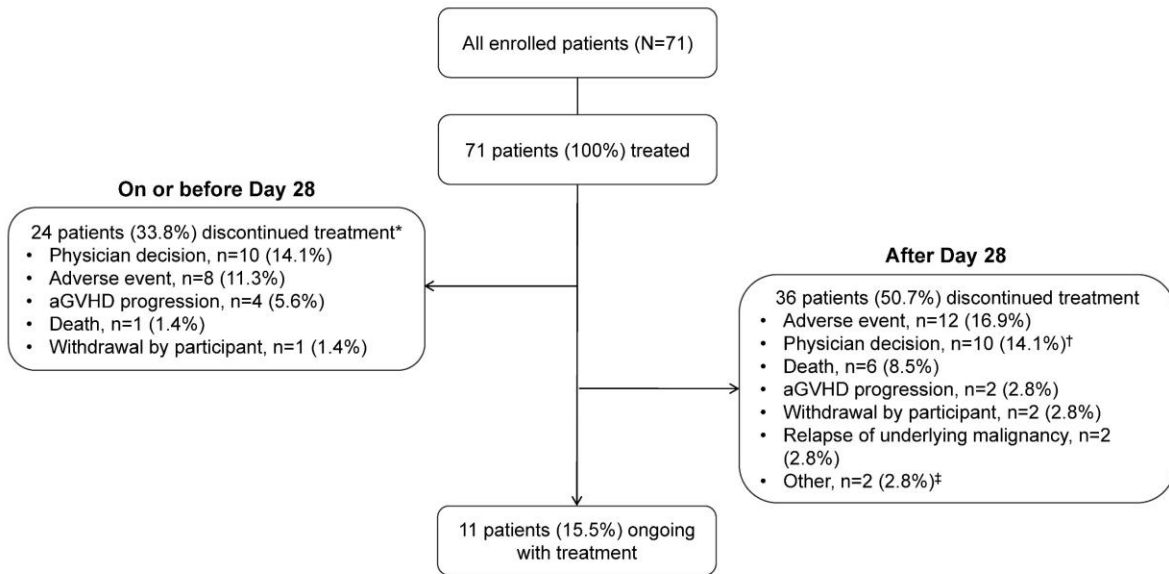

The data cutoff was July 2, 2018.

\* One patient (1.4%) discontinued study treatment on Day 28 (adverse event).

† Includes 4 patients who discontinued because of clinical improvement.

‡ Other reasons for treatment discontinuation included transfer of care to an out-of-state facility and need for additional GVHD treatment (n=1 each).

## Supplemental Figure 2. Mortality by response status

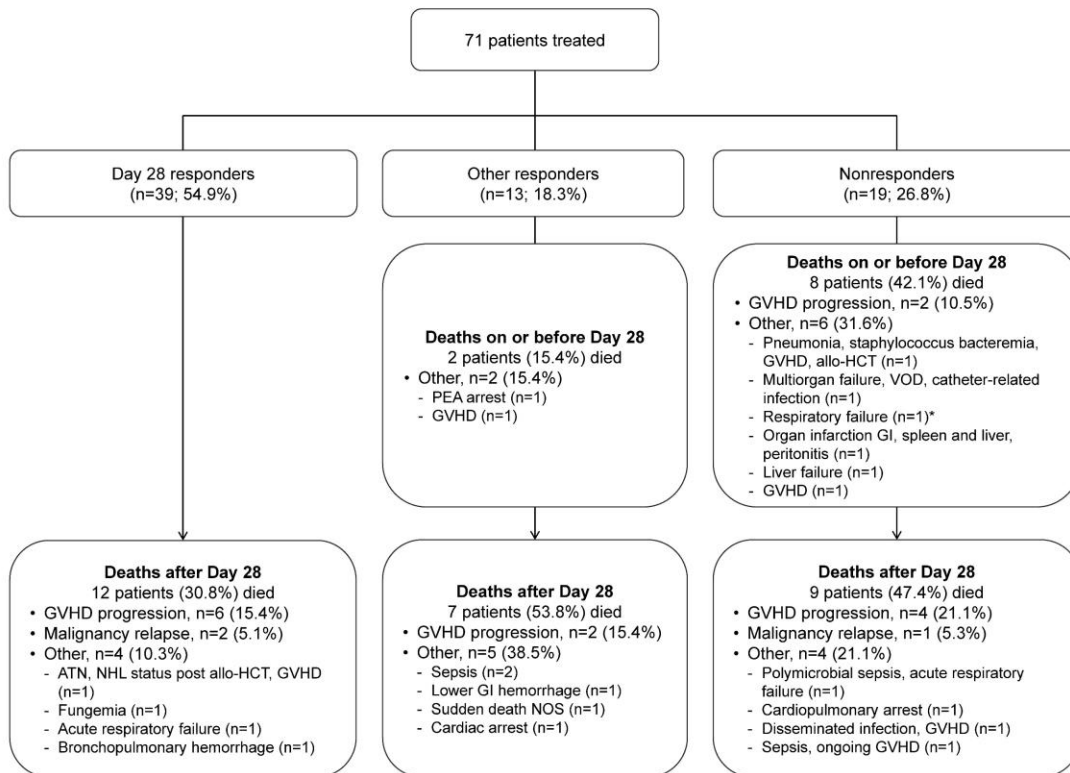

The data cutoff was July 2, 2018.

ATN, acute tubular necrosis; NHL, non-Hodgkin lymphoma; NOS, not otherwise specified; PEA, pulseless electrical activity; VOD, veno-occlusive disease.

\* Death occurred on Day 28.



**Supplemental Figure 3. Longitudinal ST2, REG3A, TNFR1, and Trappin-2/Elafin expression**

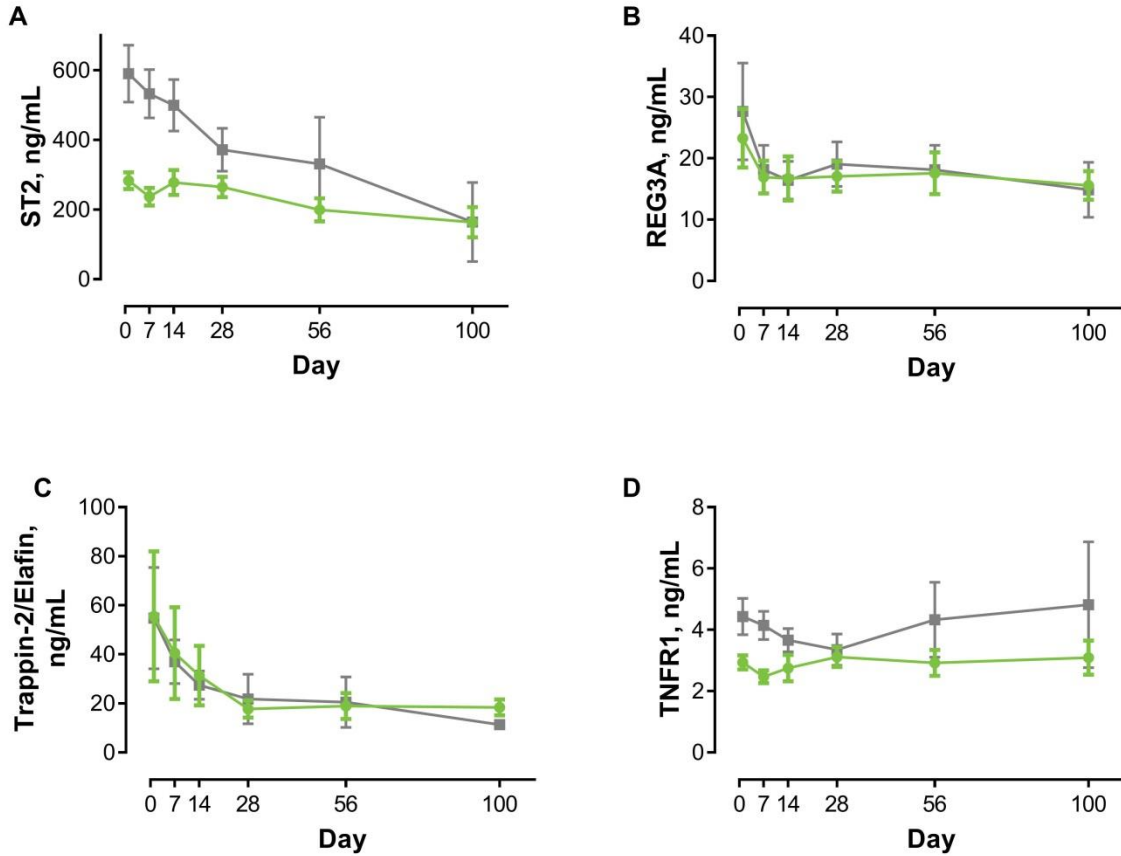

Mean concentrations of (A) ST2, (B) REG3A, (C) Trappin-2/Elafin, and (D) TNFR1 ( $\pm$  SEM) were plotted for each clinical response group including responders (complete response, very good partial response, partial response; green circles) and nonresponders (mixed response, progressive disease/death; grey squares) at designated visits.

**Supplemental Figure 4. Heatmap of significantly modulated proteins in the responder cohort (n=36)**

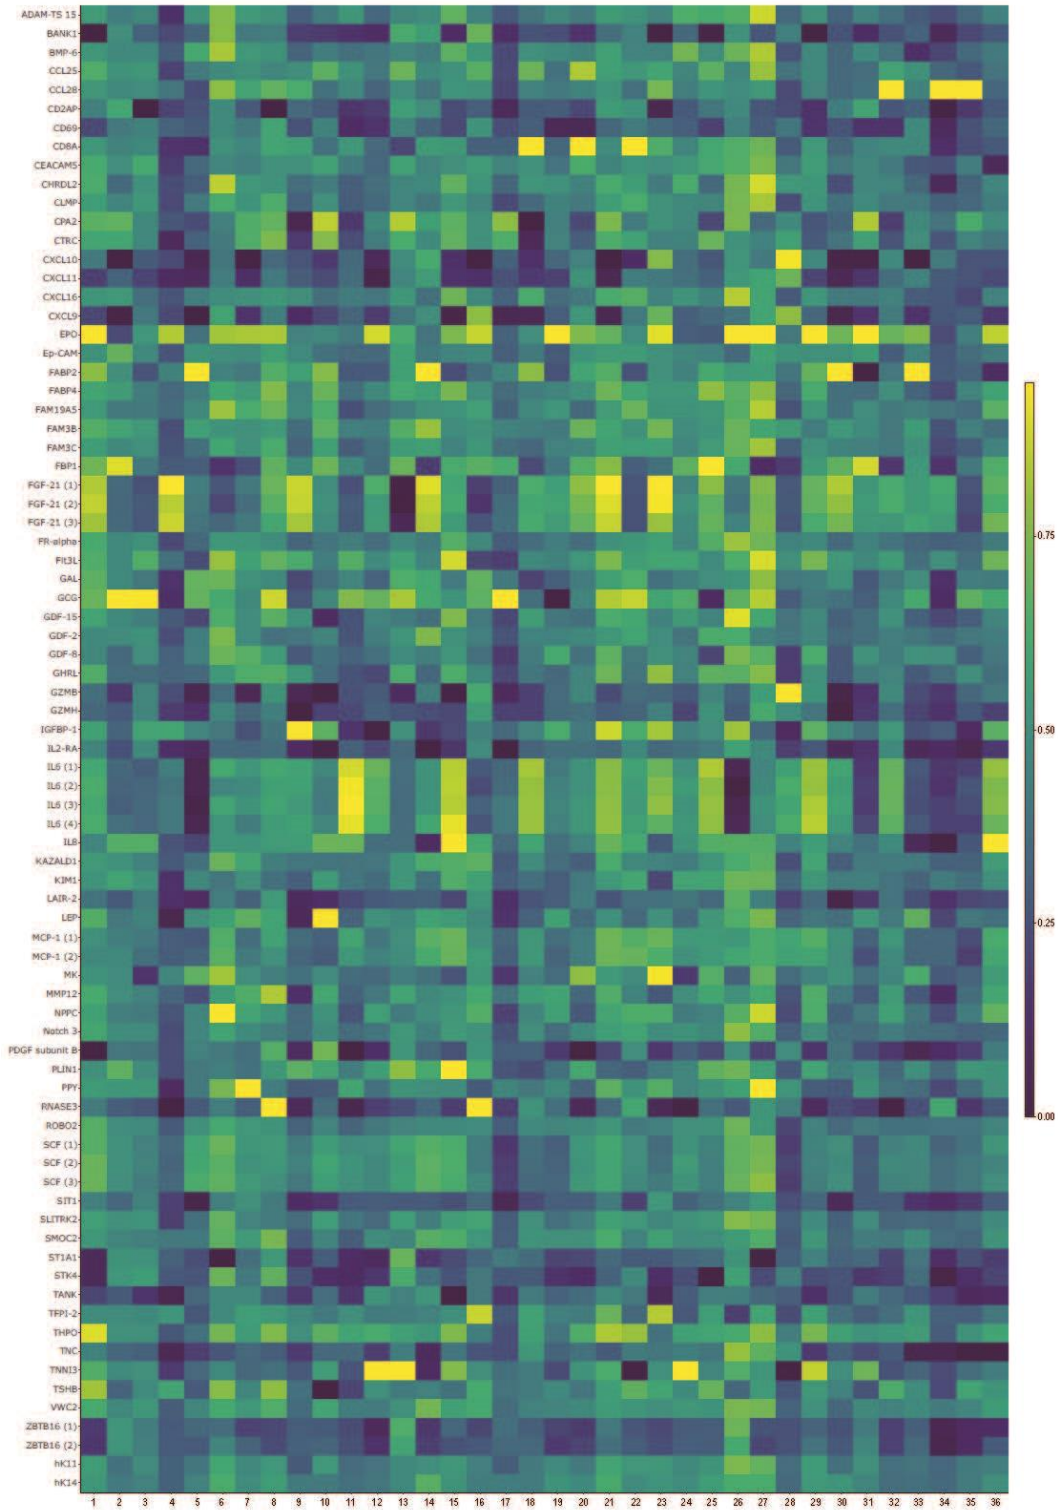

Broad proteomic analysis was conducted on 1012 proteins in circulation at baseline and Day 28. Significance was conferred at  $P < 0.05$  and absolute fold-change calculated as Day 28/baseline  $> 1.5$  (ie,  $> 1.5$  or  $< 0.66$ ) within each

group. False discovery rate  $P$  values were calculated across strata. A total of 60 proteins were upregulated, and 19 were downregulated in responders. Ingenuity pathway analysis identified hematopoiesis and interleukin-17-mediated inflammation as key pathways modulated in responders.

## Supplemental references

1. Harris AC, Young R, Devine S, et al. International, multicenter standardization of acute graft-versus-host disease clinical data collection: a report from the Mount Sinai Acute GVHD International Consortium. *Biol Blood Marrow Transplant*. 2016;22(1):4-10.
2. Center for International Blood & Marrow Transplant Research (CIBMTR). Clinical trial endpoints for patients with acute GVHD. <https://www.cibmtr.org/Meetings/Materials/GVHDworkshop/pages/index.aspx>. Accessed February 1, 2019.
3. Martin PJ, Bachier CR, Klingemann HG, et al. Endpoints for clinical trials testing treatment of acute graft-versus-host disease: a joint statement. *Biol Blood Marrow Transplant*. 2009;15(7):777-784.
4. Jagasia MH, Greinix HT, Arora M, et al. National Institutes of Health consensus development project on criteria for clinical trials in chronic graft-versus-host disease: I. The 2014 diagnosis and staging working group report. *Biol Blood Marrow Transplant*. 2015;21(3):389-401.
5. Galili T, O'Callaghan A, Sidi J, Sievert C. Heatmaply: an R package for creating interactive cluster heatmaps for online publishing. *Bioinformatics*. 2018;34(9):1600-1602.
